# Supplementary material for: Direct measurement of multi-elements in high matrix samples with a flow injection ICP-MS: application to the extendedEmiliania huxleyiRedfield ratio
Source: Royal Society of Chemistry journal article supplement (doi:10.1039/c8ja00031j), 2018-01-01
Supplement: c8ja00031j1.pdf [file c8ja00031j1.pdf]

Table S1 Composition of different trace elements in growth media.

| Component | Molar concentration in medium  | Concentration ( <i>Ho et al., 2003</i> ) |
|-----------|--------------------------------|------------------------------------------|
| Fe        | $1.00 \times 10^{-6} \text{M}$ | $4.5 \times 10^{-7} \text{M}$            |
| Zn        | $7.97 \times 10^{-8} \text{M}$ | $8.0 \times 10^{-8} \text{M}$            |
| Mn        | $1.21 \times 10^{-7} \text{M}$ | $1.2 \times 10^{-7} \text{M}$            |
| Co        | $5.03 \times 10^{-8} \text{M}$ | $5.0 \times 10^{-8} \text{M}$            |
| Mo        | $1.00 \times 10^{-7} \text{M}$ | $1.0 \times 10^{-7} \text{M}$            |
| Cu        | $1.96 \times 10^{-8} \text{M}$ | $2.0 \times 10^{-8} \text{M}$            |
| Se        | $1.00 \times 10^{-8} \text{M}$ | $1.0 \times 10^{-8} \text{M}$            |
| Cd        | NA.                            | $1.5 \times 10^{-8} \text{M}$            |

Figure S1 Dissolved Cu and Al concentration in surface water (original data are from Geotraces 2017 data product [*Mawji et al., 2015*]). Although Cu concentration data are not available from the North Sea, it is assumed to be higher than that in the Southern Ocean, considering a larger input of dust in the North.

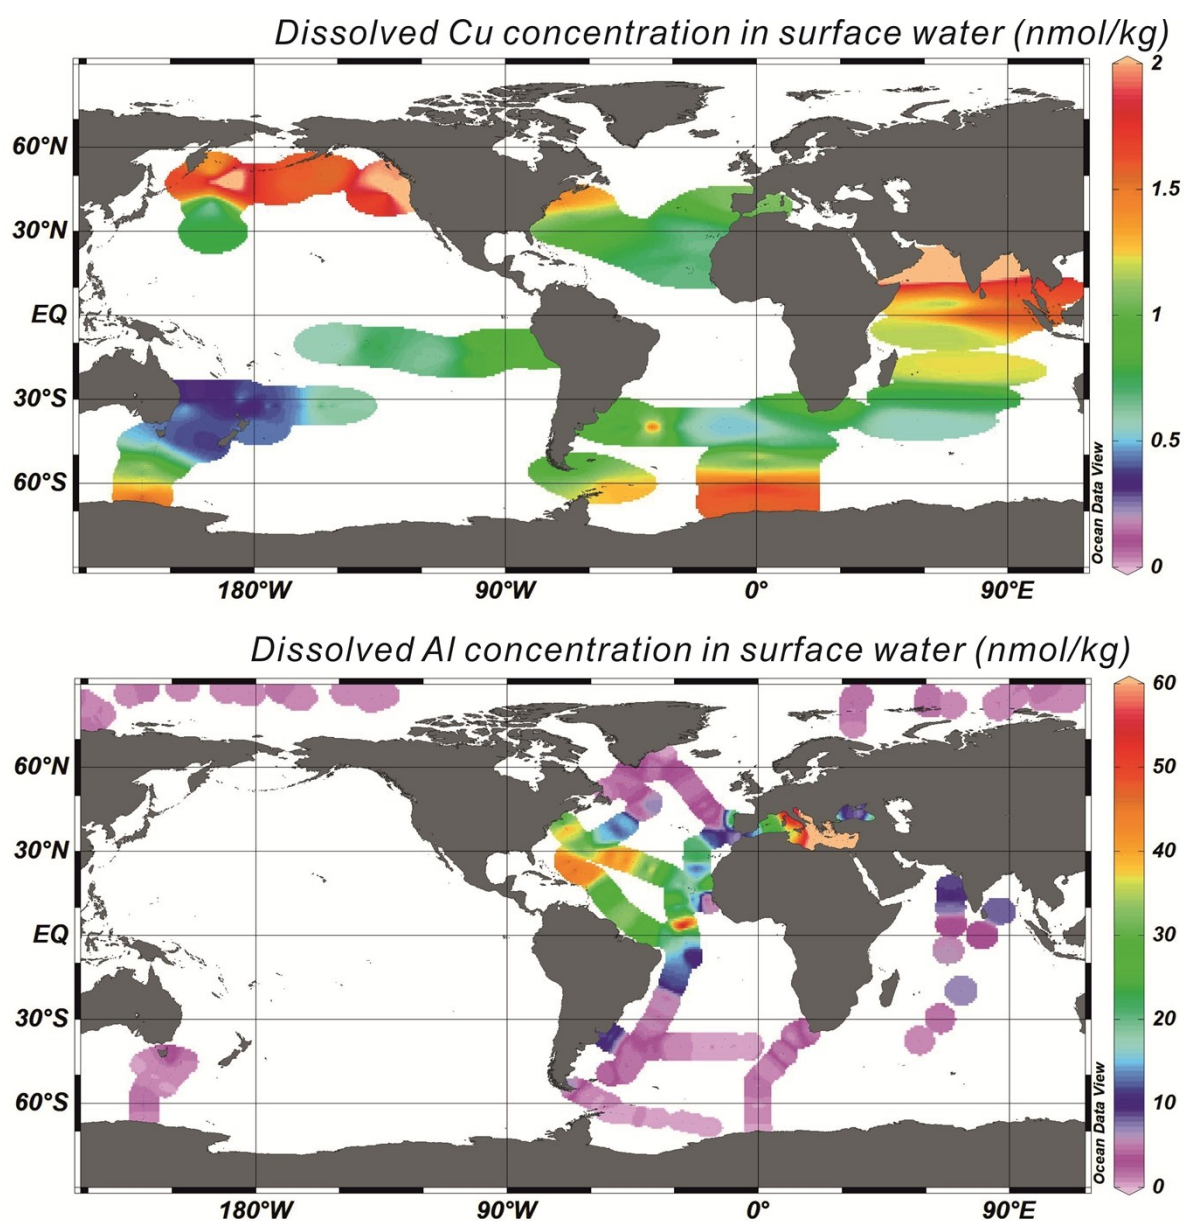

Mawji, E., et al. (2015), The GEOTRACES Intermediate Data Product 2014, *Marine Chemistry*, 177, 1-8.
